# Supplementary material for: Cerebral regional tissue Oxygen Saturation to Guide Oxygen Delivery in preterm neonates during immediate transition after birth (COSGOD III): multicentre randomised phase 3 clinical trial
Source: PubMed Central journal article supplement — BMJ. 2023 Jan 24;380:e072313. doi: 10.1136/bmj-2022-072313 (PMC9871806; doi:10.1136/bmj-2022-072313), 2023-01-24
Supplement: picg072313.ww1.pdf [file picg072313.ww1.pdf]

## Supplementary Figure S1

Cerebral regional oxygen saturation (crSO<sub>2</sub>) during the first 15 minutes after birth in neonates with additional cerebral tissue oxygen saturation monitoring to standard monitoring combined with defined treatment guidelines (NIRS-group) and in neonates with standard monitoring and standard treatment (control-group)

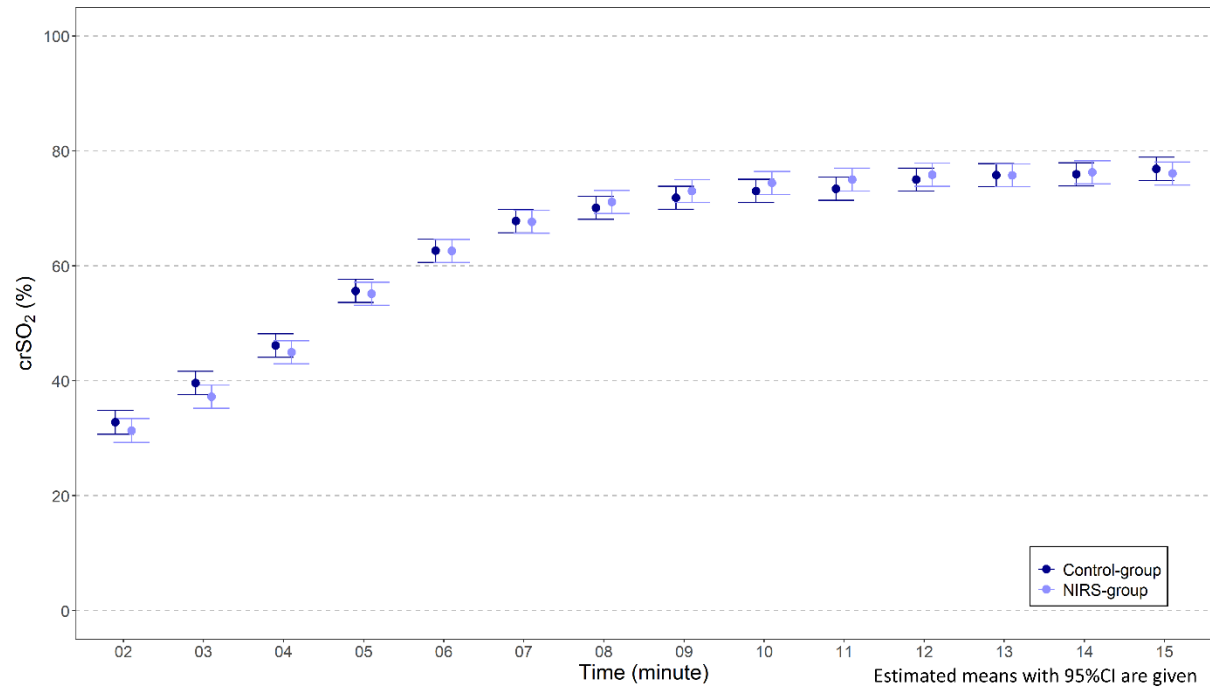

## Supplementary Figure S2

Percentage of cerebral regional oxygen saturation (crSO<sub>2</sub>) missing values at each minute in neonates with additional cerebral tissue oxygen saturation monitoring to standard monitoring combined with defined treatment guidelines (NIRS-group) and in neonates with standard monitoring and standard treatment (control-group)

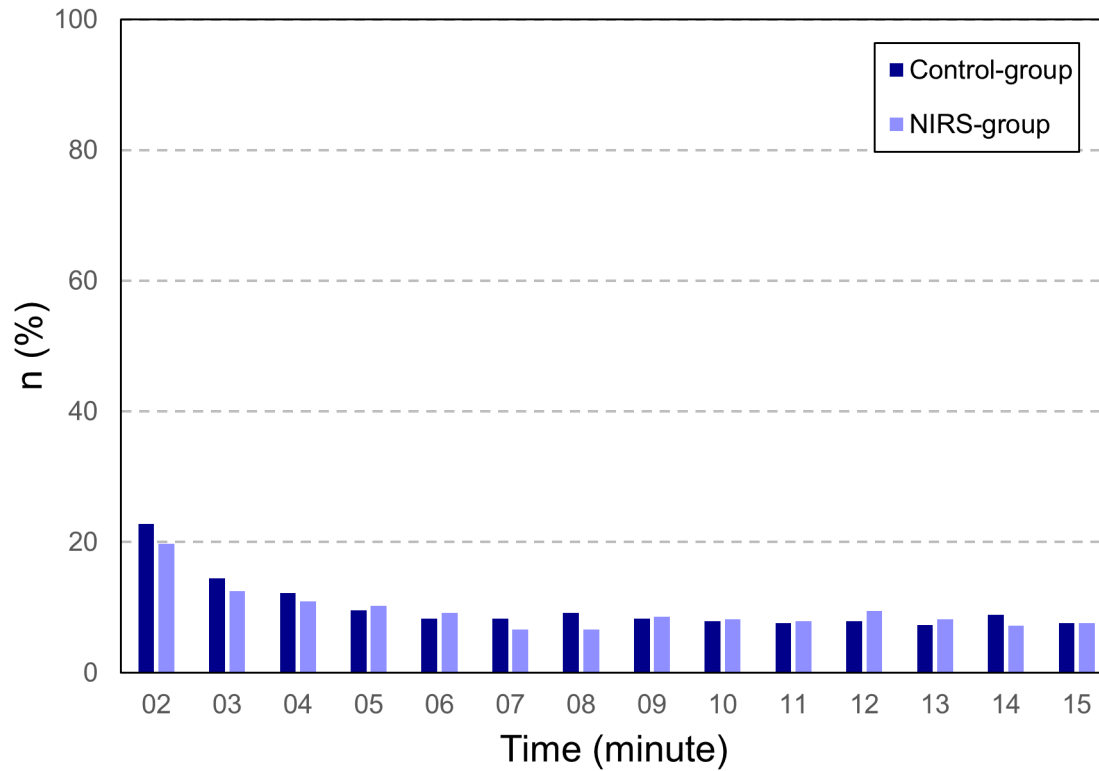

## Supplementary Table 1

Primary composite outcome measure, primary outcome measures and secondary outcome parameters at term age or before discharge in preterm neonates with gestational age <28weeks and ≥28 weeks

|                                                      | Gestational age <28weeks |                             |                     |         | Gestational age ≥28 weeks |                             |                     |         |
|------------------------------------------------------|--------------------------|-----------------------------|---------------------|---------|---------------------------|-----------------------------|---------------------|---------|
|                                                      | NIRS<br>group<br>n = 110 | Control<br>group<br>n = 118 | RR (95% CI)         | P-value | NIRS<br>group<br>n = 194  | Control<br>group<br>n = 185 | RR (95% CI)         | P-value |
| <i>Primary composite outcome</i>                     |                          |                             |                     |         |                           |                             |                     |         |
| Survival without cerebral injury*, n (%)             | 78 (70.9)                | 78 (66.1)                   | 1.13 (0.83 to 1.52) |         | 174 (89.7)                | 160 (86.5)                  | 1.17 (0.83 to 1.65) |         |
| <i>Primary outcome measures</i>                      |                          |                             |                     |         |                           |                             |                     |         |
| Death and/or cerebral injury*, n (%)                 | 32 (29.1)                | 40 (33.9)                   | 0.90 (0.69 to 1.17) |         | 20 (10.3)                 | 25 (13.5)                   | 0.86 (0.64 to 1.15) |         |
| Death, n (%)                                         | 10 (9.1)                 | 16 (13.6)                   | 0.82 (0.59 to 1.14) |         | 2 (1.0)                   | 0 (0.0)                     | -                   |         |
| Intraventricular hemorrhage any grade, n (%)         | 23 (20.9)                | 30 (25.4)                   | 0.89 (0.67 to 1.17) |         | 18 (9.3)                  | 25 (13.5)                   | 0.82 (0.62 to 1.08) |         |
| No intraventricular hemorrhage, n (%)                | 87 (79.1)                | 88 (74.6)                   |                     | .69     | 176 (90.7)                | 160 (86.5)                  |                     | .39     |
| Intraventricular hemorrhage I-II, n (%)              | 14 (12.7)                | 17 (14.4)                   |                     |         | 15 (7.7)                  | 22 (11.9)                   |                     |         |
| Intraventricular hemorrhage III-IV, n (%)            | 9 (8.2)                  | 13 (11.0)                   |                     |         | 3 (1.6)                   | 3 (1.6)                     |                     |         |
| Cystic periventricular leukomalacia any grade, n (%) | 6 (5.5)                  | 1 (0.9)                     | 3.7 (0.6 to 22.8)   |         | 2 (1.0)                   | 2 (1.1)                     | 0.98 (0.36 to 2.61) |         |
| No cystic periventricular leukomalacia, n (%)        | 104 (94.6)               | 117 (99.2)                  |                     | .10     | 192 (99.0)                | 183 (98.9)                  |                     | .14     |
| Cystic periventricular leukomalacia II, n (%)        | 3 (2.7)                  | 0 (0.0)                     |                     |         | 0 (0.0)                   | 2 (1.1)                     |                     |         |
| Cystic periventricular leukomalacia III, n (%)       | 3 (2.7)                  | 1 (0.9)                     |                     |         | 2 (1.0)                   | 0 (0.0)                     |                     |         |
| <i>Secondary outcome/morbidities</i>                 |                          |                             |                     |         |                           |                             |                     |         |
| Respiratory distress syndrome, n (%)                 | 98 (89.1)                | 104 (88.1)                  | 1.05 (0.71 to 1.53) |         | 150 (77.3)                | 140 (75.7)                  | 1.05 (0.83 to 1.33) |         |
| No respiratory distress syndrome, n (%)              | 12 (10.9)                | 14 (11.9)                   |                     | .90     | 44 (22.7)                 | 45 (24.3)                   |                     | .96     |
| Respiratory distress syndrome not defined, n (%)     | 10 (9.1)                 | 11 (9.3)                    |                     |         | 16 (8.3)                  | 17 (9.2)                    |                     |         |
| Respiratory distress syndrome Grade 1-2, n (%)       | 58 (52.7)                | 66 (55.9)                   |                     |         | 105 (54.1)                | 97 (52.4)                   |                     |         |

|                                                         |           |           |                     |           |           |                      |
|---------------------------------------------------------|-----------|-----------|---------------------|-----------|-----------|----------------------|
| Respiratory distress syndrome Grade 3-4, n (%)          | 30 (27.3) | 27 (22.9) |                     | 29 (15.0) | 26 (14.1) |                      |
| Culture proven sepsis, n (%)                            | 48 (43.6) | 66 (55.9) | 0.79 (0.61 to 1.02) | 43 (22.2) | 45 (24.3) | 0.94 (0.74 to 1.19)  |
| Necrotizing enterocolitis any grade, n (%)              | 13 (11.8) | 11 (9.3)  | 1.14 (0.73 to 1.80) | 4 (2.1)   | 4 (2.2)   | 0.98 (0.48 to 1.979) |
| Bronchopulmonary dysplasia†, n (%)                      | 47 (42.7) | 45 (38.1) | 1.10 (0.85 to 1.42) | 7 (3.6)   | 12 (6.5)  | 0.76 (0.53 to 1.09)  |
| Retinopathy of prematurity ≥ Grade 2, n (%)             | 28 (25.5) | 31 (26.3) | 0.98 (0.74 to 1.30) | 7 (3.6)   | 2 (1.1)   | 2.23 (0.65 to 7.59)  |
| Persistent ductus arteriosus with intervention**, n (%) | 28 (25.5) | 39 (33.1) | 0.84 (0.65 to 1.09) | 13 (6.7)  | 15 (8.1)  | 0.90 (0.63 to 1.30)  |

\* defined as any intraventricular hemorrhage and/or cystic periventricular leukomalacia at term age or before discharge

† defined as oxygen dependency or need of respiratory support at 36 weeks corrected age

\*\* medical and/or surgical intervention

## Supplementary Table 2

Primary composite outcome measure, primary outcome measures and secondary outcome parameters at term age or before discharge in neonates delivered by cesarean section and neonates delivered vaginally

|                                                      | Cesarean section         |                             |                     |         | Vaginal delivery        |                            |                      |         |
|------------------------------------------------------|--------------------------|-----------------------------|---------------------|---------|-------------------------|----------------------------|----------------------|---------|
|                                                      | NIRS<br>group<br>n = 253 | Control<br>group<br>n = 258 | RR (95% CI)         | P-value | NIRS<br>group<br>n = 49 | Control<br>group<br>n = 43 | RR (95% CI)          | P-value |
| <i>Primary composite outcome</i>                     |                          |                             |                     |         |                         |                            |                      |         |
| Survival without cerebral injury*, n (%)             | 213 (84.2)               | 207 (80.2)                  | 1.05 (0.97 to 1.14) |         | 37 (75.5)               | 29 (67.4)                  | 1.12 (0.86 to 1.45)  |         |
| <i>Primary outcome measures</i>                      |                          |                             |                     |         |                         |                            |                      |         |
| Death and/or cerebral injury*, n (%)                 | 40 (15.8)                | 51 (19.8)                   | 0.80 (0.55 to 1.16) |         | 12 (24.5)               | 14 (32.6)                  | 0.75 (0.39 to 1.45)  |         |
| Death, n (%)                                         | 10 (4.0)                 | 12 (4.7)                    | 0.85 (0.97 to 1.05) |         | 2 (4.1)                 | 4 (9.3)                    | 0.44 (0.08 to 2.28)  |         |
| Intraventricular hemorrhage any grade, n (%)         | 32 (12.7)                | 42 (16.3)                   | 0.78 (0.51 to 1.19) |         | 9 (18.4)                | 13 (30.2)                  | 0.61 (0.29 to 1.28)  |         |
| No intraventricular hemorrhage, n (%)                | 221 (87.4)               | 216 (83.7)                  |                     | .51     | 40 (81.6)               | 30 (69.8)                  |                      | .41     |
| Intraventricular hemorrhage I-II, n (%)              | 23 (9.1)                 | 30 (11.6)                   |                     |         | 6 (12.2)                | 9 (20.9)                   |                      |         |
| Intraventricular hemorrhage III-IV, n (%)            | 9 (3.6)                  | 12 (4.7)                    |                     |         | 3 (6.1)                 | 4 (9.3)                    |                      |         |
| Cystic periventricular leukomalacia any grade, n (%) | 5 (2.0)                  | 2 (0.8)                     | 2.55 (0.50 to 13.0) |         | 3 (6.1)                 | 1 (2.3)                    | 2.63 (0.28 to 24.38) |         |
| No cystic periventricular leukomalacia, n (%)        | 248 (98.0)               | 256 (99.2)                  | -                   | .15     | 46 (93.9)               | 42 (97.7)                  |                      | .62     |
| Cystic periventricular leukomalacia II, n (%)        | 0 (0.0)                  | 1 (0.4)                     |                     |         | 0 (0.0)                 | 0 (0.0)                    |                      |         |
| Cystic periventricular leukomalacia III, n (%)       | 5 (2.0)                  | 1 (0.4)                     |                     |         | 3 (6.1)                 | 1 (2.3)                    |                      |         |
| <i>Secondary outcome/morbidities</i>                 |                          |                             |                     |         |                         |                            |                      |         |
| Respiratory distress syndrome, n (%)                 | 208 (82.2)               | 206 (79.8)                  | 1.03 (0.95 to 1.12) |         | 39 (79.6)               | 37 (86.1)                  | 0.93 (0.77 – 1.11)   |         |
| No respiratory distress syndrome, n (%)              | 45 (17.8)                | 52 (20.2)                   |                     | .71     | 10 (20.4)               | 6 (14.0)                   |                      | .77     |
| Respiratory distress syndrome not defined, n (%)     | 18 (7.1)                 | 21 (8.1)                    |                     |         | 7 (14.3)                | 6 (14.0)                   |                      |         |

|                                                         |            |            |                     |           |           |                     |
|---------------------------------------------------------|------------|------------|---------------------|-----------|-----------|---------------------|
| Respiratory distress syndrome Grade 1-2, n (%)          | 139 (54.9) | 142 (55.0) |                     | 24 (49.0) | 21 (48.8) |                     |
| Respiratory distress syndrome Grade 3-4, n (%)          | 51 (20.2)  | 43 (16.7)  |                     | 8 (16.3)  | 10 (23.3) |                     |
| Culture proven sepsis, n (%)                            | 78 (30.8)  | 89 (34.5)  | 0.89 (0.70 to 1.15) | 12 (24.5) | 21 (48.8) | 0.50 (0.28 to 0.89) |
| Necrotizing enterocolitis any grade, n (%)              | 14 (5.5)   | 10 (3.9)   | 1.43 (0.65 to 3.15) | 3 (6.1)   | 5 (11.6)  | 0.52 (0.13 to 2.08) |
| Bronchopulmonary dysplasia†, n (%)                      | 45 (17.8)  | 46 (17.8)  | 1.00 (0.69 to 1.45) | 9 (18.4)  | 10 (23.3) | 0.79 (0.35 to 1.76) |
| Retinopathy of prematurity ≥ Grade 2, n (%)             | 30 (11.9)  | 25 (9.7)   | 1.22 (0.74 to 2.02) | 5 (10.2)  | 8 (18.6)  | 0.55 (0.19 to 1.55) |
| Persistent ductus arteriosus with intervention**, n (%) | 34 (13.4)  | 44 (17.1)  | 0.79 (0.52 to 1.19) | 6 (12.2)  | 10 (23.3) | 0.53 (0.21 to 1.33) |

\* defined as any intraventricular hemorrhage and/or cystic periventricular leukomalacia at term age or before discharge

† defined as oxygen dependency or need of respiratory support at 36 weeks corrected age

\*\* medical and/or surgical intervention

### Supplementary Table 3

Arterial oxygen saturation (SpO<sub>2</sub>) and fraction of inspired supplemental oxygen (FiO<sub>2</sub>) during the first 15 minutes after birth in neonates with additional cerebral tissue oxygen saturation monitoring to standard monitoring combined with defined treatment guidelines (NIRS-group) and in neonates with standard monitoring and standard treatment (control-group)

| Minute | SpO <sub>2</sub> |                  | FiO <sub>2</sub> |                  |
|--------|------------------|------------------|------------------|------------------|
|        | Control Group    | NIRS Group       | Control Group    | NIRS Group       |
| 2      | 56.4 (54.7-58.1) | 56.3 (54.6-58.0) | 0.33 (0.31-0.35) | 0.35 (0.33-0.37) |
| 3      | 62.2 (60.6-63.8) | 61.4 (59.8-63.0) | 0.40 (0.38-0.42) | 0.41 (0.39-0.43) |
| 4      | 69.8 (68.2-71.4) | 70.1 (68.5-71.6) | 0.44 (0.42-0.46) | 0.46 (0.44-0.48) |
| 5      | 78.3 (76.7-79.8) | 77.6 (76.1-79.2) | 0.44 (0.42-0.46) | 0.48 (0.45-0.50) |
| 6      | 83.6 (82.0-85.2) | 82.5 (81.0-84.1) | 0.44 (0.42-0.46) | 0.47 (0.45-0.49) |
| 7      | 86.7 (85.1-88.2) | 85.9 (84.3-87.4) | 0.42 (0.40-0.44) | 0.45 (0.42-0.47) |
| 8      | 88.4 (86.9-90.0) | 88.5 (86.9-90.1) | 0.39 (0.37-0.41) | 0.44 (0.41-0.46) |
| 9      | 89.2 (87.7-90.8) | 89.6 (88.1-91.2) | 0.37 (0.35-0.40) | 0.42 (0.40-0.44) |
| 10     | 90.0 (88.5-91.6) | 90.3 (88.8-91.9) | 0.37 (0.35-0.40) | 0.40 (0.38-0.43) |
| 11     | 90.2 (88.6-91.7) | 90.6 (89.0-92.1) | 0.36 (0.34-0.39) | 0.38 (0.36-0.41) |
| 12     | 90.7 (89.2-92.3) | 90.8 (89.2-92.3) | 0.35 (0.33-0.38) | 0.37 (0.35-0.39) |
| 13     | 90.9 (89.3-92.4) | 90.9 (89.4-92.5) | 0.35 (0.32-0.37) | 0.36 (0.34-0.38) |
| 14     | 91.1 (89.5-92.7) | 90.7 (89.1-92.2) | 0.33 (0.31-0.36) | 0.36 (0.33-0.38) |
| 15     | 91.9 (90.3-93.5) | 90.6 (89.1-92.2) | 0.33 (0.31-0.35) | 0.35 (0.33-0.37) |
